# Supplementary material
Source: Royal Society of Chemistry journal article supplement (doi:10.1039/d6fo00279j)
Supplement: d6fo00279j2.pdf [file d6fo00279j2.pdf]

**Supplementary Material-Table S1.** Fatty acid composition of dietary lipid sources used in the study. Data are

| <b>Fatty acid</b>                              | <b>RPO</b>   | <b>EVOO</b>  | <b>ROO</b>   | <b>ω3-LCPUFA</b> |
|------------------------------------------------|--------------|--------------|--------------|------------------|
| <i>Lauric acid (C12:0)</i>                     | 0.43 ± 0.01  | n.d.         | n.d.         | n.d.             |
| <i>Myristic acid (C14:0)</i>                   | 1.48 ± 0.01  | 0.09 ± 0.01  | 0.10 ± 0.02  | 0.08 ± 0.00      |
| <i>Palmitic acid (C16:0)</i>                   | 41.11 ± 0.93 | 15.93 ± 0.12 | 15.71 ± 0.38 | 9.99 ± 0.29      |
| <i>14-methylpentadecanoic acid (Iso-C16:0)</i> | 0.36 ± 0.04  | 0.15 ± 0.03  | 0.15 ± 0.01  | 0.12 ± 0.01      |
| <i>Palmitoleic acid (C16:1ω7)</i>              | 0.87 ± 0.04  | 2.23 ± 0.00  | 1.97 ± 0.01  | 1.31 ± 0.15      |
| <i>Margaric acid (C17:0)</i>                   | 0.13 ± 0.03  | n.d.         | n.d.         | n.d.             |
| <i>Stearic acid (C18:0)</i>                    | 6.07 ± 0.22  | 3.32 ± 0.09  | 4.40 ± 0.27  | 3.29 ± 0.07      |
| <i>Oleic acid (C18:1ω9)</i>                    | 36.65 ± 0.44 | 68.53 ± 0.01 | 65.78 ± 0.67 | 38.94 ± 0.02     |
| <i>Linoleic acid (C18:2ω6)</i>                 | 11.59 ± 0.29 | 7.34 ± 0.23  | 10.08 ± 0.02 | 6.82 ± 0.12      |
| <i>γ-Linolenic acid (C18:3ω6γ)</i>             | n.d.         | n.d.         | n.d.         | 0.10 ± 0.03      |
| <i>α-linolenic acid (C18:3ω3α)</i>             | 0.49 ± 0.05  | 1.45 ± 0.02  | 0.93 ± 0.08  | 0.53 ± 0.05      |
| <i>Arachidic acid (C20:0)</i>                  | 0.31 ± 0.05  | 0.28 ± 0.02  | 0.23 ± 0.03  | 0.88 ± 0.04      |
| <i>Gondoic acid (C20:1ω9)</i>                  | n.d.         | 0.32 ± 0.02  | 0.23 ± 0.03  | 0.15 ± 0.00      |
| <i>Eicosadienoic acid (C20:2ω6)</i>            | 0.52 ± 0.02  | n.d.         | n.d.         | 0.15 ± 0.00      |
| <i>Dihomo-γ-linolenic acid (C20:3ω6)</i>       | n.d.         | n.d.         | n.d.         | 0.05 ± 0.01      |
| <i>Eicosatrienoic acid (C20:3ω3)</i>           | n.d.         | 0.25 ± 0.06  | 0.24 ± 0.01  | 0.15 ± 0.00      |
| <i>Arachidonic acid (C20:4ω6)</i>              | n.d.         | 0.11 ± 0.01  | 0.07 ± 0.02  | 0.77 ± 0.07      |
| <i>Eicosapentaenoic acid (C20:5ω3)</i>         | n.d.         | n.d.         | n.d.         | 19.17 ± 0.65     |
| <i>Behenic acid (C22:0)</i>                    | n.d.         | n.d.         | n.d.         | 0.27 ± 0.04      |
| <i>Docosapentaenoic acid (C22:5ω3)</i>         | n.d.         | n.d.         | n.d.         | 1.25 ± 0.09      |
| <i>Docosahexaenoic acid (C22:6ω3)</i>          | n.d.         | n.d.         | n.d.         | 15.55 ± 0.28     |
| <i>Tricosanoic acid (C23:0)</i>                | n.d.         | n.d.         | n.d.         | 0.40 ± 0.07      |
| <i>Total saturated fatty acids</i>             | 49.89 ± 0.72 | 19.77 ± 0.07 | 20.61 ± 0.70 | 15.03 ± 0.21     |
| <i>Total monounsaturated fatty acids</i>       | 37.52 ± 0.36 | 71.07 ± 0.06 | 68.05 ± 0.62 | 40.41 ± 0.11     |
| <i>Total polyunsaturated fatty acids</i>       | 12.60 ± 0.36 | 9.16 ± 0.14  | 11.33 ± 0.08 | 44.55 ± 0.32     |
| <i>Omega-3</i>                                 | 0.49 ± 0.05  | 1.71 ± 0.06  | 1.17 ± 0.08  | 36.66 ± 0.42     |
| <i>Omega-6</i>                                 | 12.11 ± 0.27 | 7.45 ± 0.22  | 10.16 ± 0.02 | 7.89 ± 0.11      |
| <i>Omega-6/omega-3 ratio</i>                   | 24.71 ± 2.49 | 4.37 ± 0.17  | 8.68 ± 0.50  | 0.22 ± 0.01      |

expressed as % of total identified fatty acids (mean ± SD, *n* = 3 technical replicates per oil).

RPO, refined palm oil; EVOO, extra-virgin olive oil; ROO, refined olive oil; ω3-LCPUFA, omega-3 long-chain polyunsaturated fatty acids

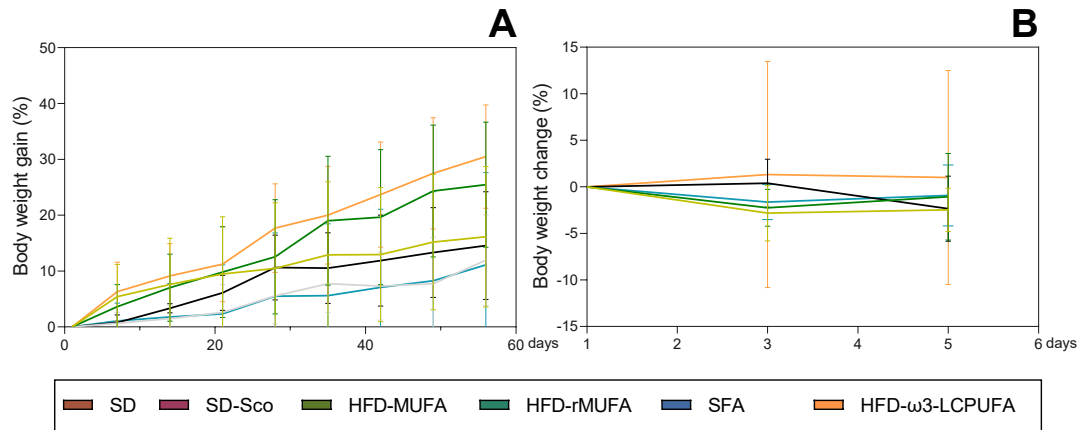

**Supplementary Material-Figure S1. Body-weight trajectories diverge with dietary fat quality over 10 weeks, with distinct patterns during scopolamine induction.** (A) Weekly body weight during the dietary intervention before scopolamine for SD, HFD-MUFA (EVOO), HFD-rMUFA (ROO), HFD-SFA, and HFD- $\omega$ 3-LCPUFA. The SFA diet produced the largest gain, refined MUFA an intermediate profile, EVOO-MUFA attenuated weight gain relative to ROO, and  $\omega$ 3-LCPUFA blunted gain toward SD values. (B) Body weight during the scopolamine induction week (three i.p. injections on alternating days). High-fat groups show partial weight recovery, whereas SD-Scop displays a more persistent loss. Data are mean  $\pm$  SD ( $n = 8-10$  per group). One-way ANOVA with Tukey's post hoc at week 10.

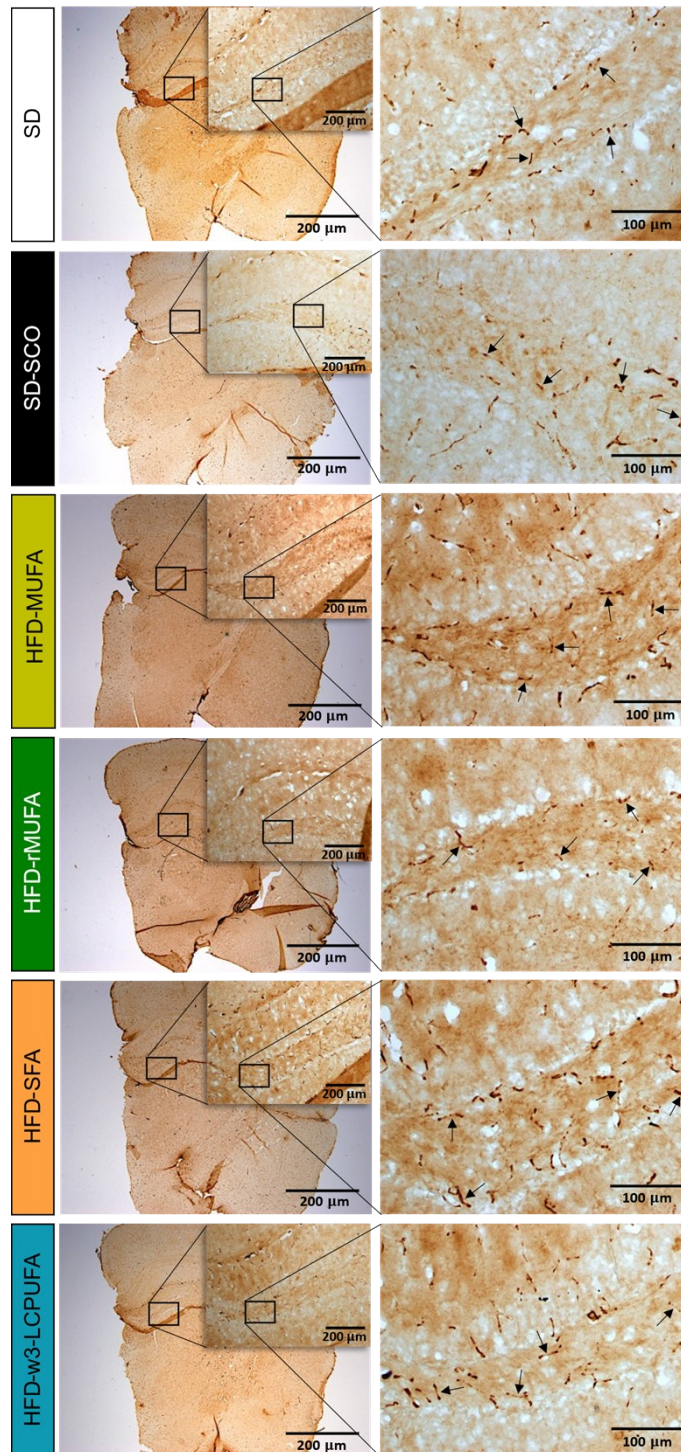

**Supplementary Material-Figure S2. Representative immunohistochemistry for TNF- $\alpha$  in dentate gyrus across dietary groups.** Low-magnification overviews with inset and high-magnification regions of interest (ROIs) for TNF- $\alpha$  staining in SD, SD-SCO, HFD-MUFA (EVOO), HFD-rMUFA (ROO), HFD-SFA (RPO), and HFD- $\omega$ 3-LCPUFA. Sections were processed with ABC/DAB under identical acquisition settings; images were selected from anatomically matched dentate-gyrus levels and collected blinded to group. Arrows indicate representative TNF- $\alpha$ -positive profiles within the dentate gyrus (brown DAB signal). Scale bars: 200  $\mu$ m (overview), 100  $\mu$ m (insets).

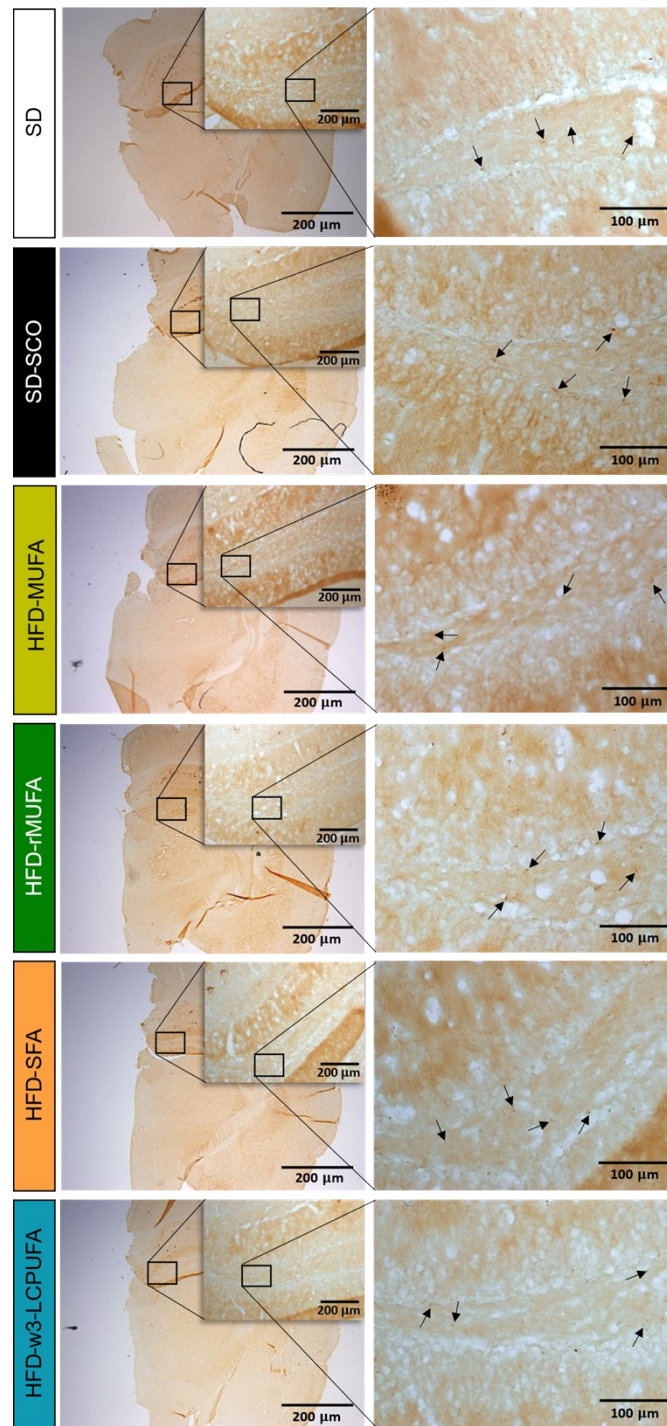

**Supplementary Material-Figure S3. Representative immunohistochemistry for COX-2 in dentate gyrus across dietary groups.** Low-magnification overviews with inset and high-magnification ROIs for COX-2 staining in SD, SD-Scop, HFD-MUFA (EVOO), HFD-rMUFA (ROO), HFD-SFA (RPO), and HFD- $\omega$ 3-LCPUFA. Sections were processed with ABC/DAB under identical acquisition settings; images were selected from anatomically matched dentate-gyrus levels and collected blinded to group. Arrows indicate representative COX-2-positive profiles within the dentate gyrus (brown DAB signal). Scale bars: 200  $\mu$ m (overview), 100  $\mu$ m (insets).
